# Supplementary material for: Features of diclofenac biodegradation by Rhodococcus ruber IEGM 346
Source: Springer Nature journal article supplement (doi:10.1038/s41598-019-45732-9), 2019-06-24
Supplement: 41598_2019_45732_MOESM1_ESM.pdf [file 41598_2019_45732_MOESM1_ESM.pdf]

## **Features of diclofenac biodegradation by *Rhodococcus ruber* IEGM 346**

**Irina B. Ivshina<sup>a,b\*</sup>, Elena A. Tyumina<sup>b</sup>, Maria V. Kuzmina<sup>c</sup>, Elena V. Vikhareva<sup>c</sup>**

<sup>a</sup> *Institute of Ecology and Genetics of Microorganisms, Ural Branch of the Russian Academy of Sciences, 13 Golev Street, 614081 Perm, Russia*

<sup>b</sup> *Perm State National Research University, 15 Bukirev Street, 614990 Perm, Russia*

<sup>c</sup> *Perm State Pharmaceutical Academy, 2 Poleyaya Street, 614990 Perm, Russia*

\* Corresponding author at: Institute of Ecology and Genetics of Microorganisms, Ural Branch of the Russian Academy of Sciences, 13 Golev Street, 614081 Perm, Russia. Tel.: +7(342)2808114. Fax: +7(342)2809211

E-mail address: [ivshina@iegm.ru](mailto:ivshina@iegm.ru) (I. B. Ivshina)

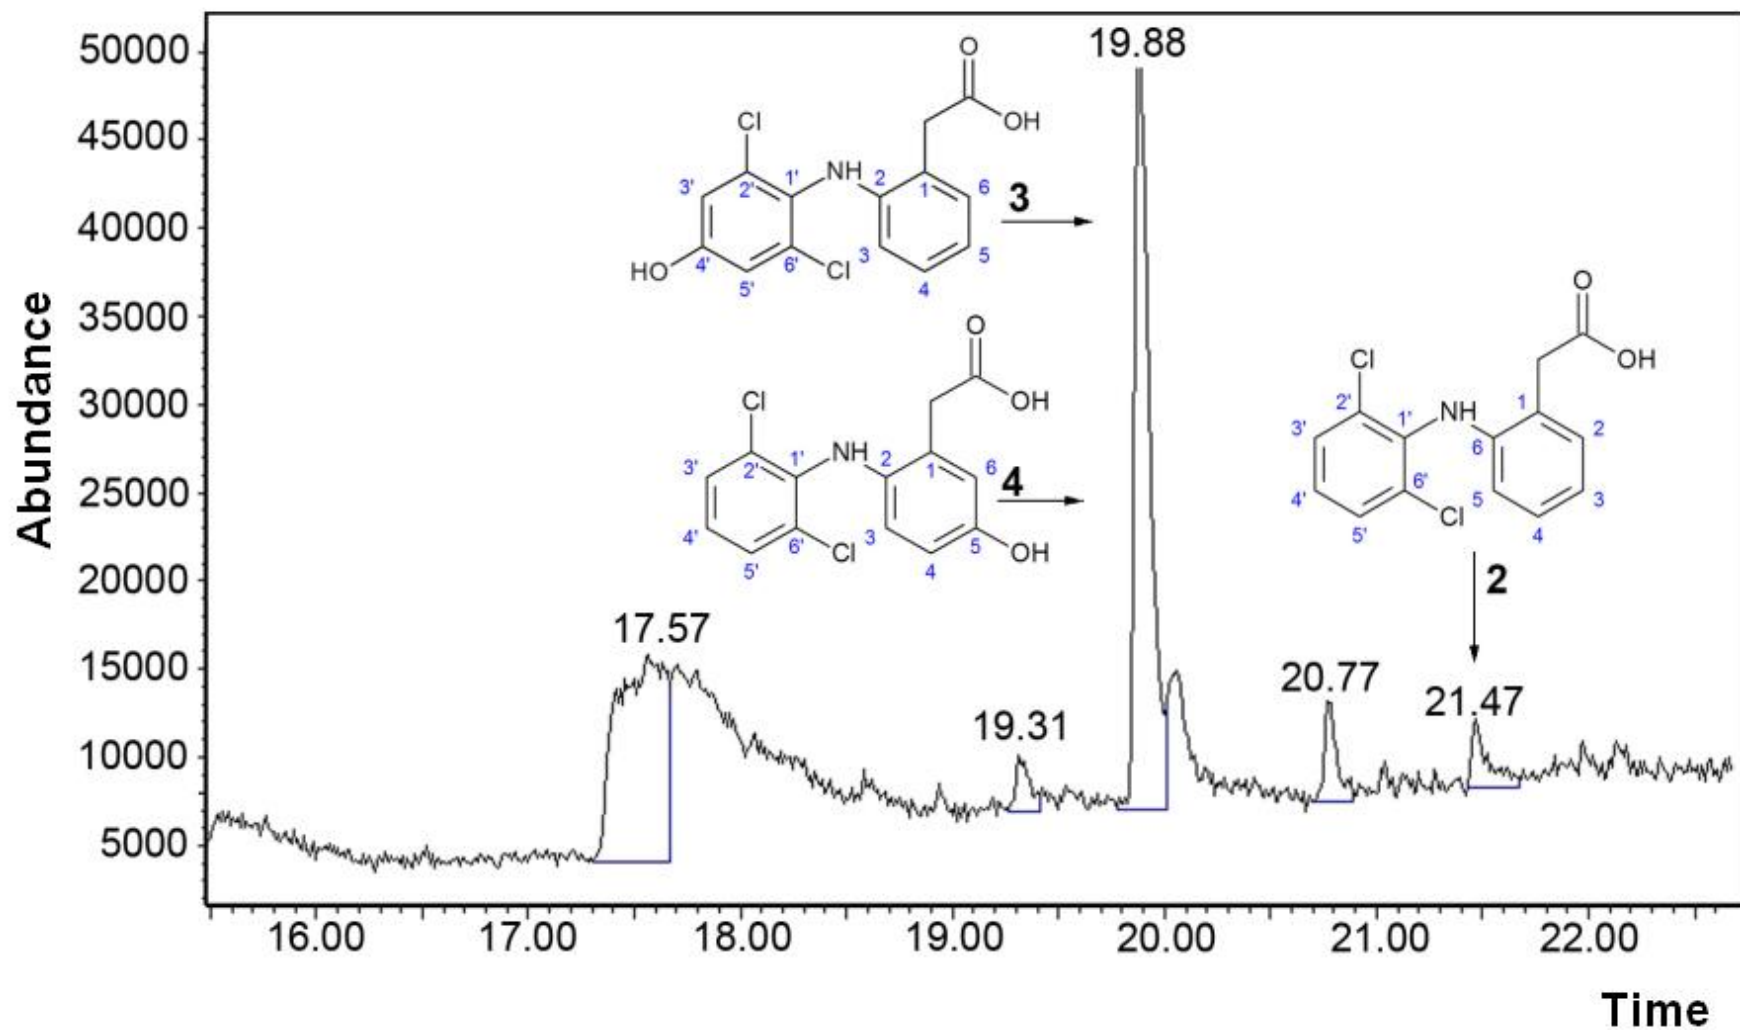

Supplementary Figure S1. Chromatogram of DCF metabolites detected in the post-fermentation medium of rhodococci at the beginning of the biodegradation process. **2** – 2-[2-(2',6'-dichloroanilino)phenyl]acetic acid; **3** – 2-[2-(2',6'-dichloro-4'-hydroxyanilino)phenyl]acetic acid; **4** – 2-[2-(2',6'-dichloroanilino)-5-hydroxyphenyl]acetic acid.

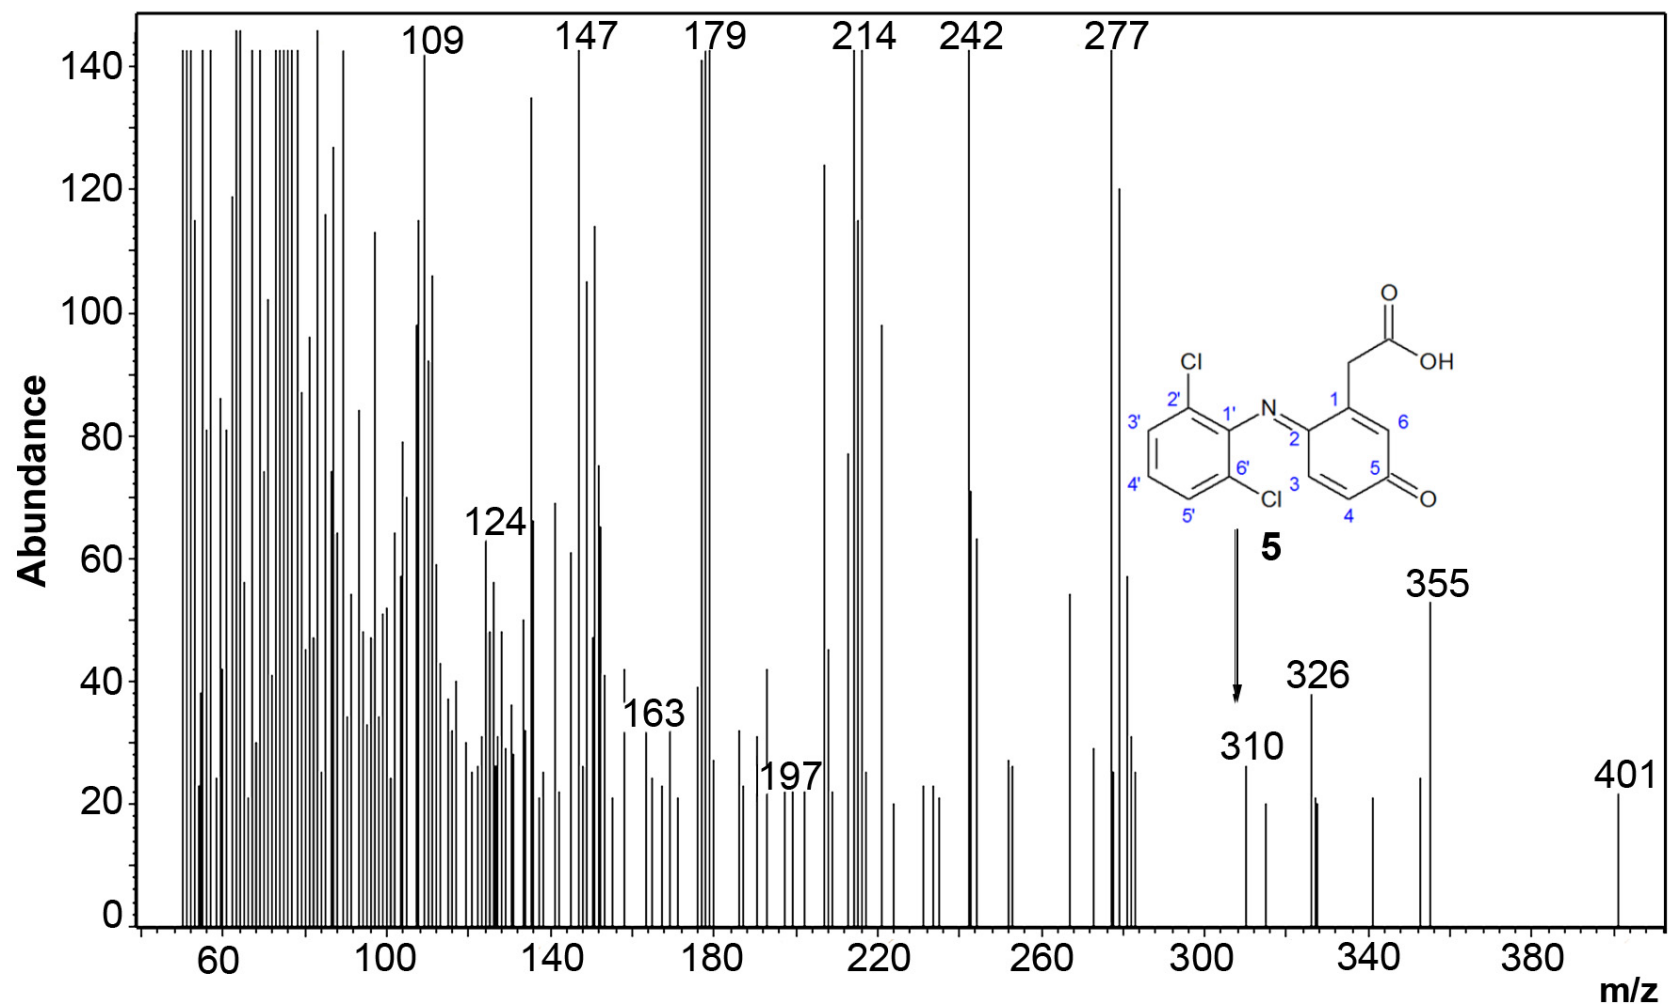

Supplementary Figure S2. Mass-spectrum of **(5)** 2-(1-(5-oxo-cyclohexa-1,3-dienyl-2-(2',6'-dichloro-phenylimino)acetic acid,  $m/z=310.0$ .

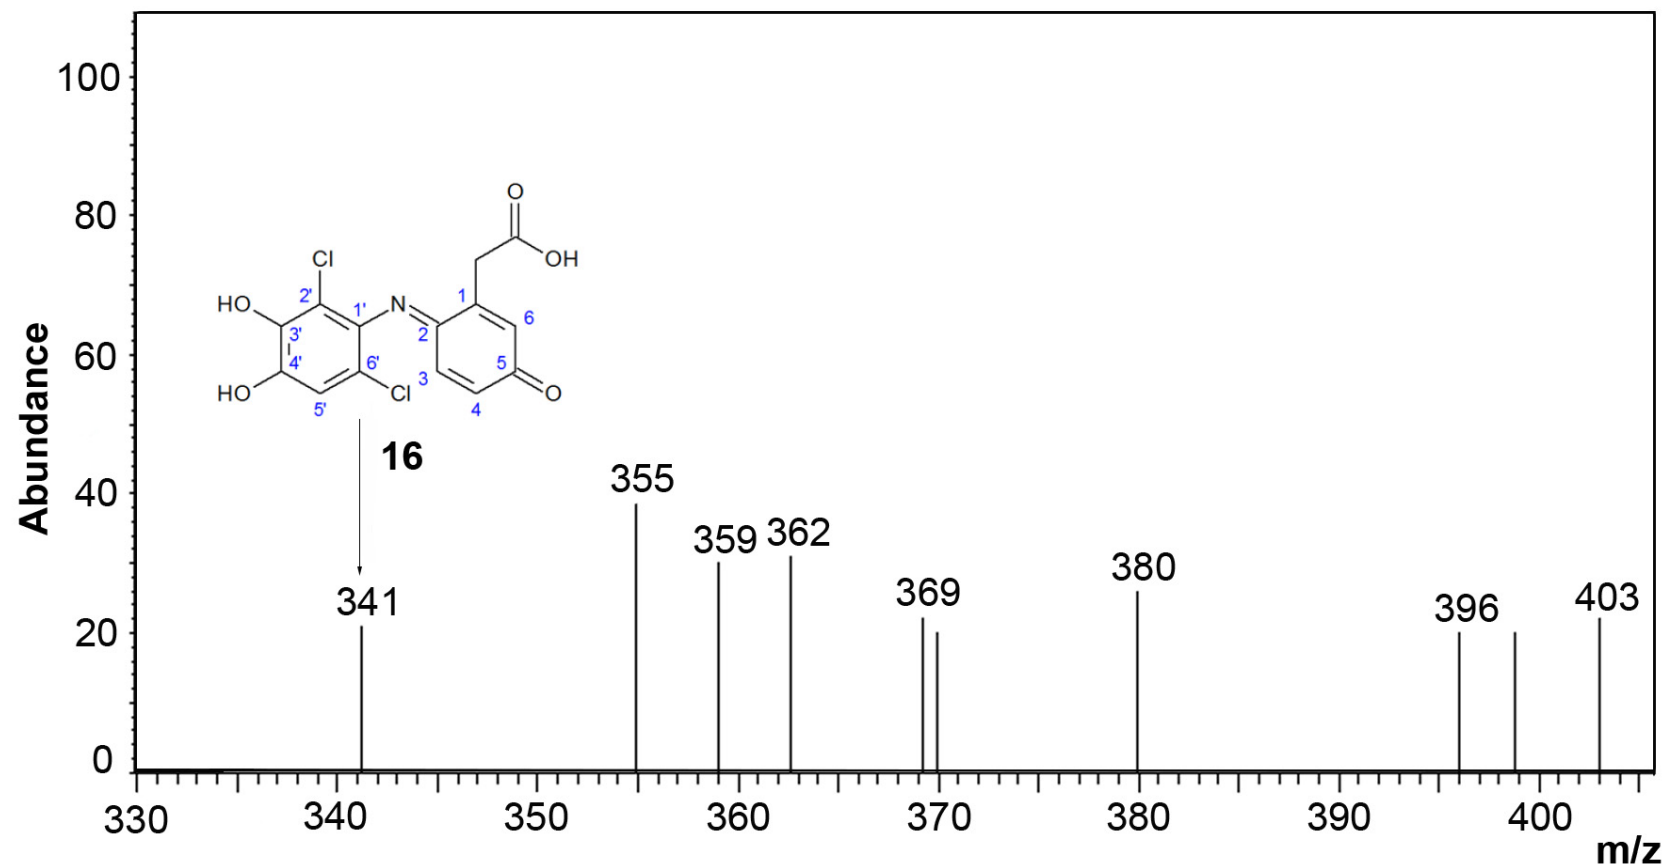

Supplementary Figure S3. Mass-spectrum of (**16**) 2-[1-(5-oxocyclohexa-1,3-dienyl-2-(3',4'-dihydroxy-2',6'-dichlorophenyl)imino)acetic acid,  $m/z=340.0$ .

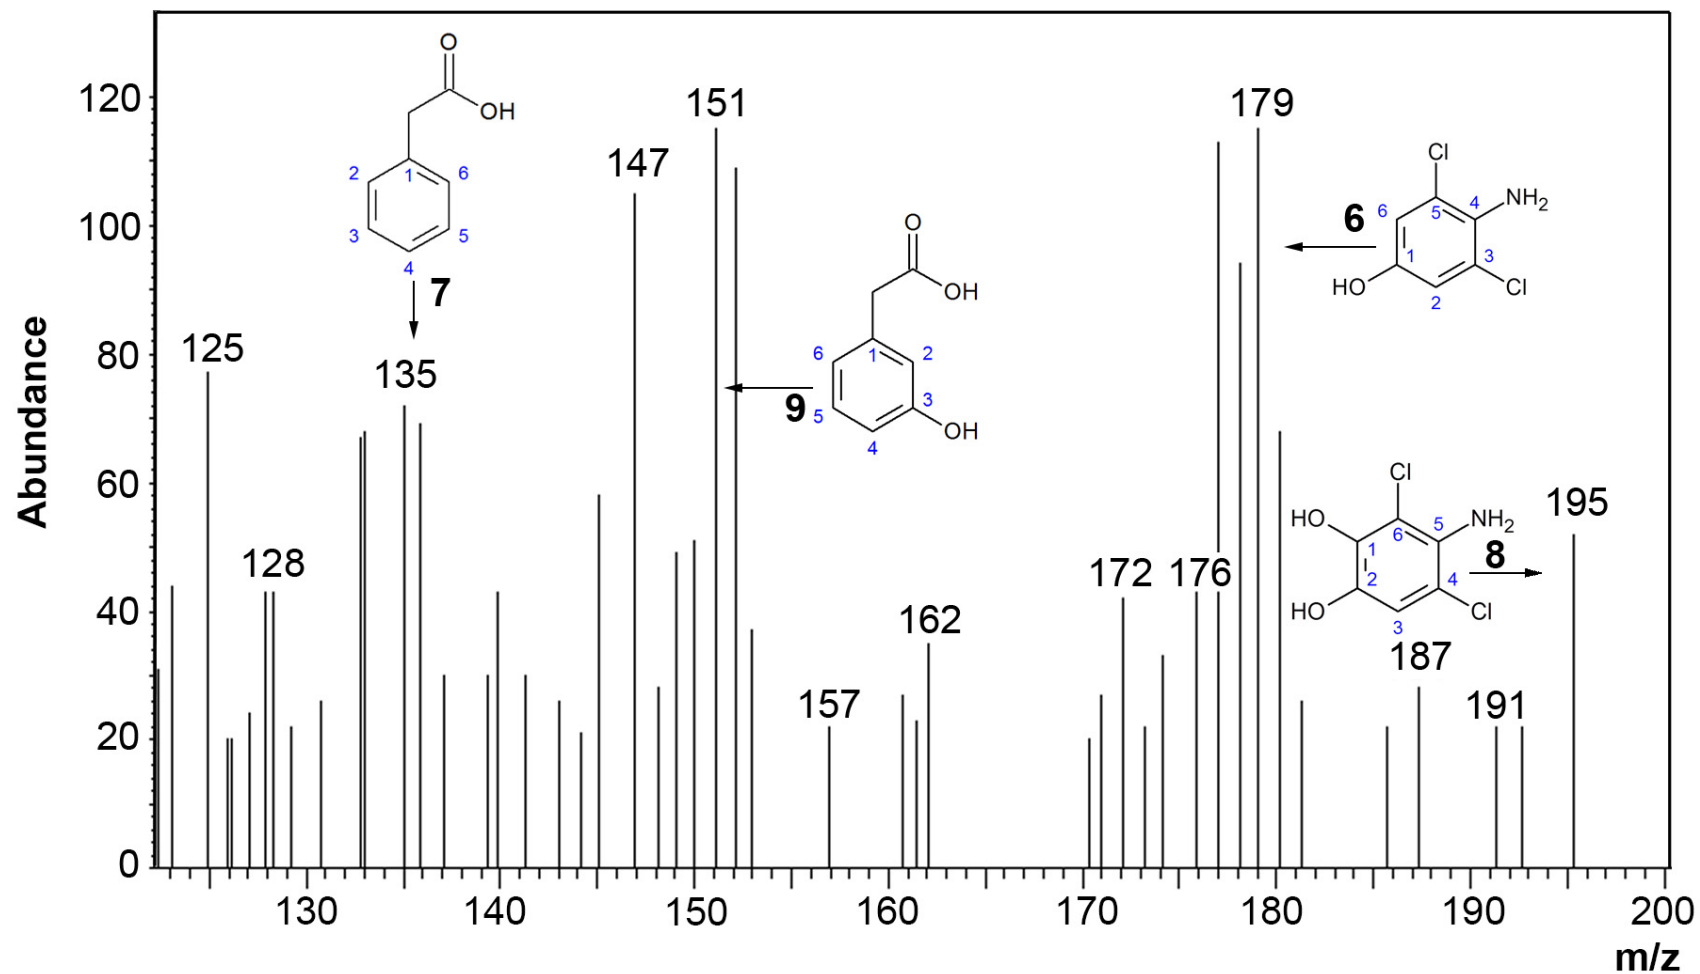

Supplementary Figure S4. Mass-spectra of **(6)** 4-amino-3,5-dichlorophenol,  $m/z=178.0$ ; **(7)** phenylacetic acid,  $m/z=136$ ; **(8)** 5-amino-4,6-dichlorobenzene-1,2-diol,  $m/z=194.0$ ; **(9)** 3-hydroxyphenylacetic acid,  $m/z=152.0$ .

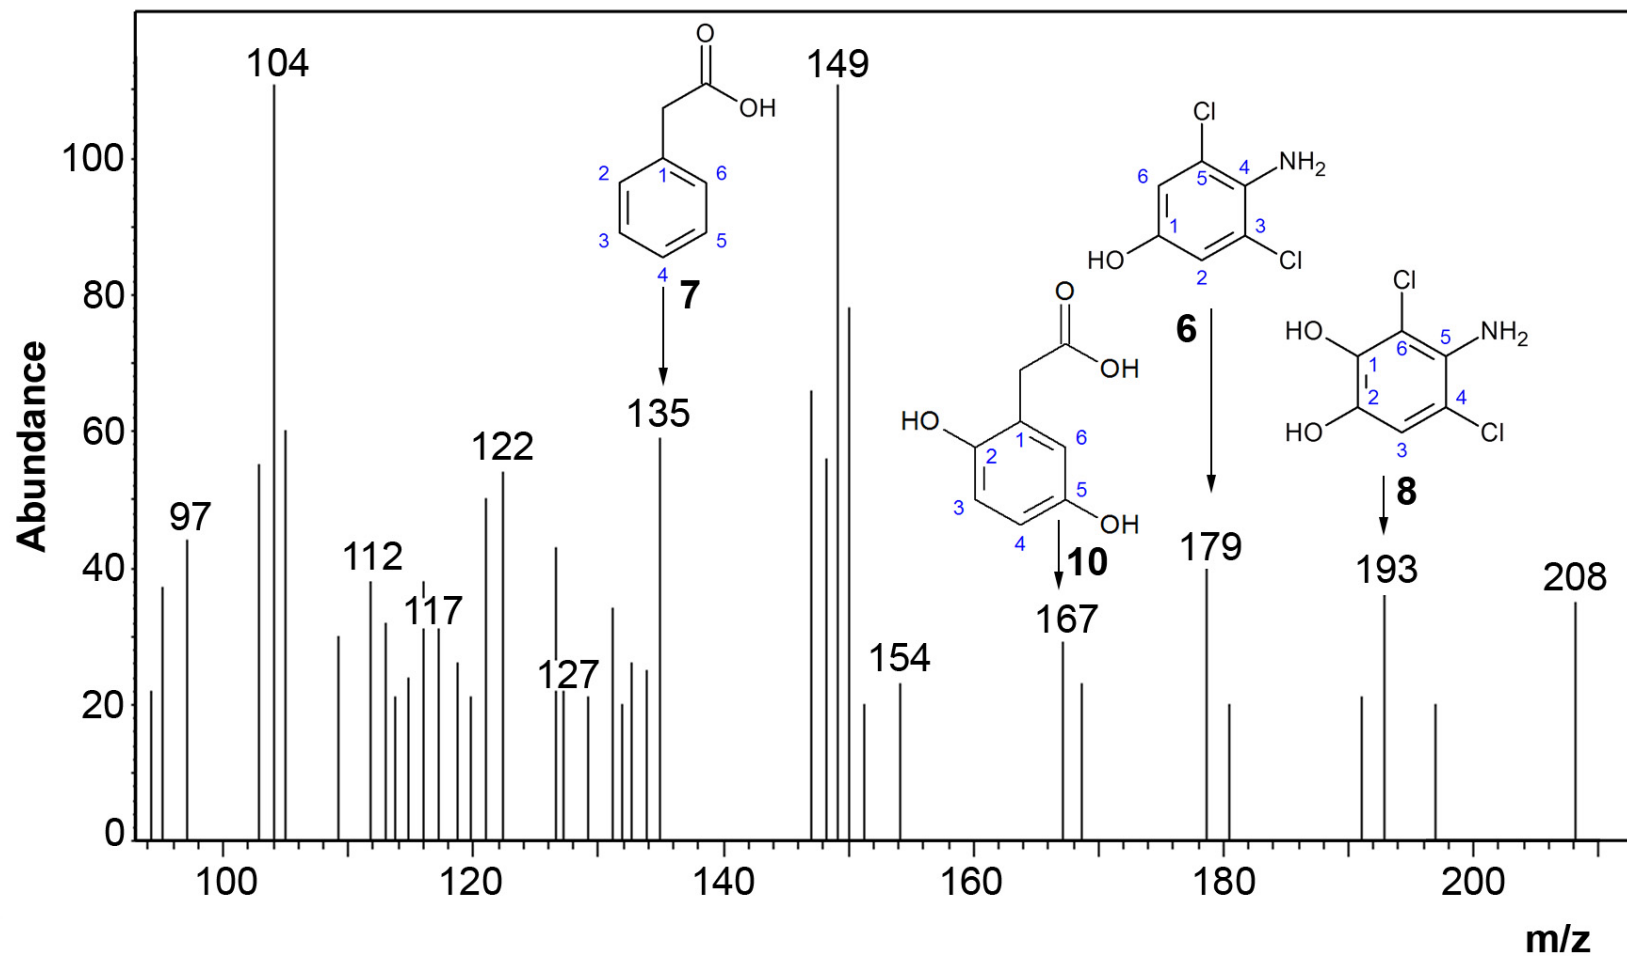

Supplementary Figure S5. Mass-spectra of **(6)** 4-amino-3,5-dichlorophenol,  $m/z=178.0$ ; **(7)** phenylacetic acid,  $m/z=136$ ; **(8)** 5-amino-4,6-dichlorobenzene-1,2-diol,  $m/z=194.0$ ; **(9)** 3-hydroxyphenylacetic acid,  $m/z=152.0$ ; **(10)** 2,5-dihydroxyphenylacetic acid (homogentisic acid),  $m/z=167.0$ .

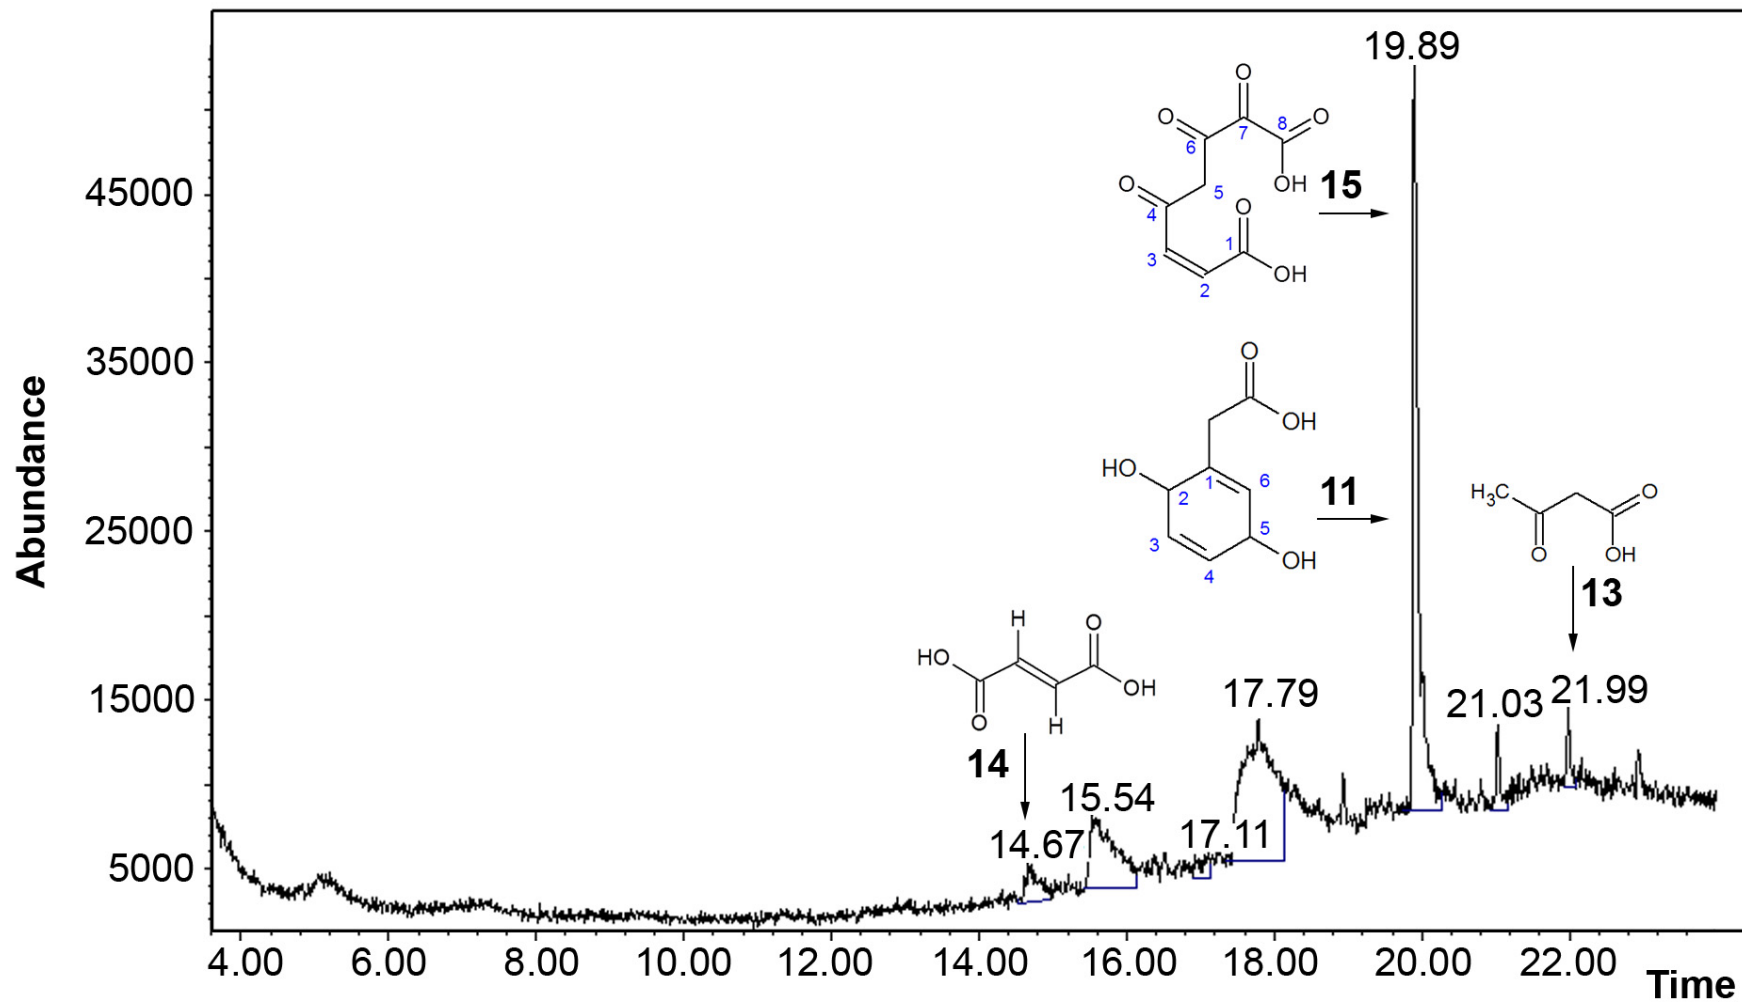

Supplementary Figure S6. Chromatogram of DCF metabolites detected in the post-fermentation medium of rhodococci at the end of the biodegradation process. **11** – 2-(*p*-benzoquinone-2)acetic acid, **13** – 3-oxobutanoic acid (acetoacetic acid), **14** – *trans*-butenedioic acid (fumaric acid), **15** – 4,6,7-trioxooct-2-enedioic acid.

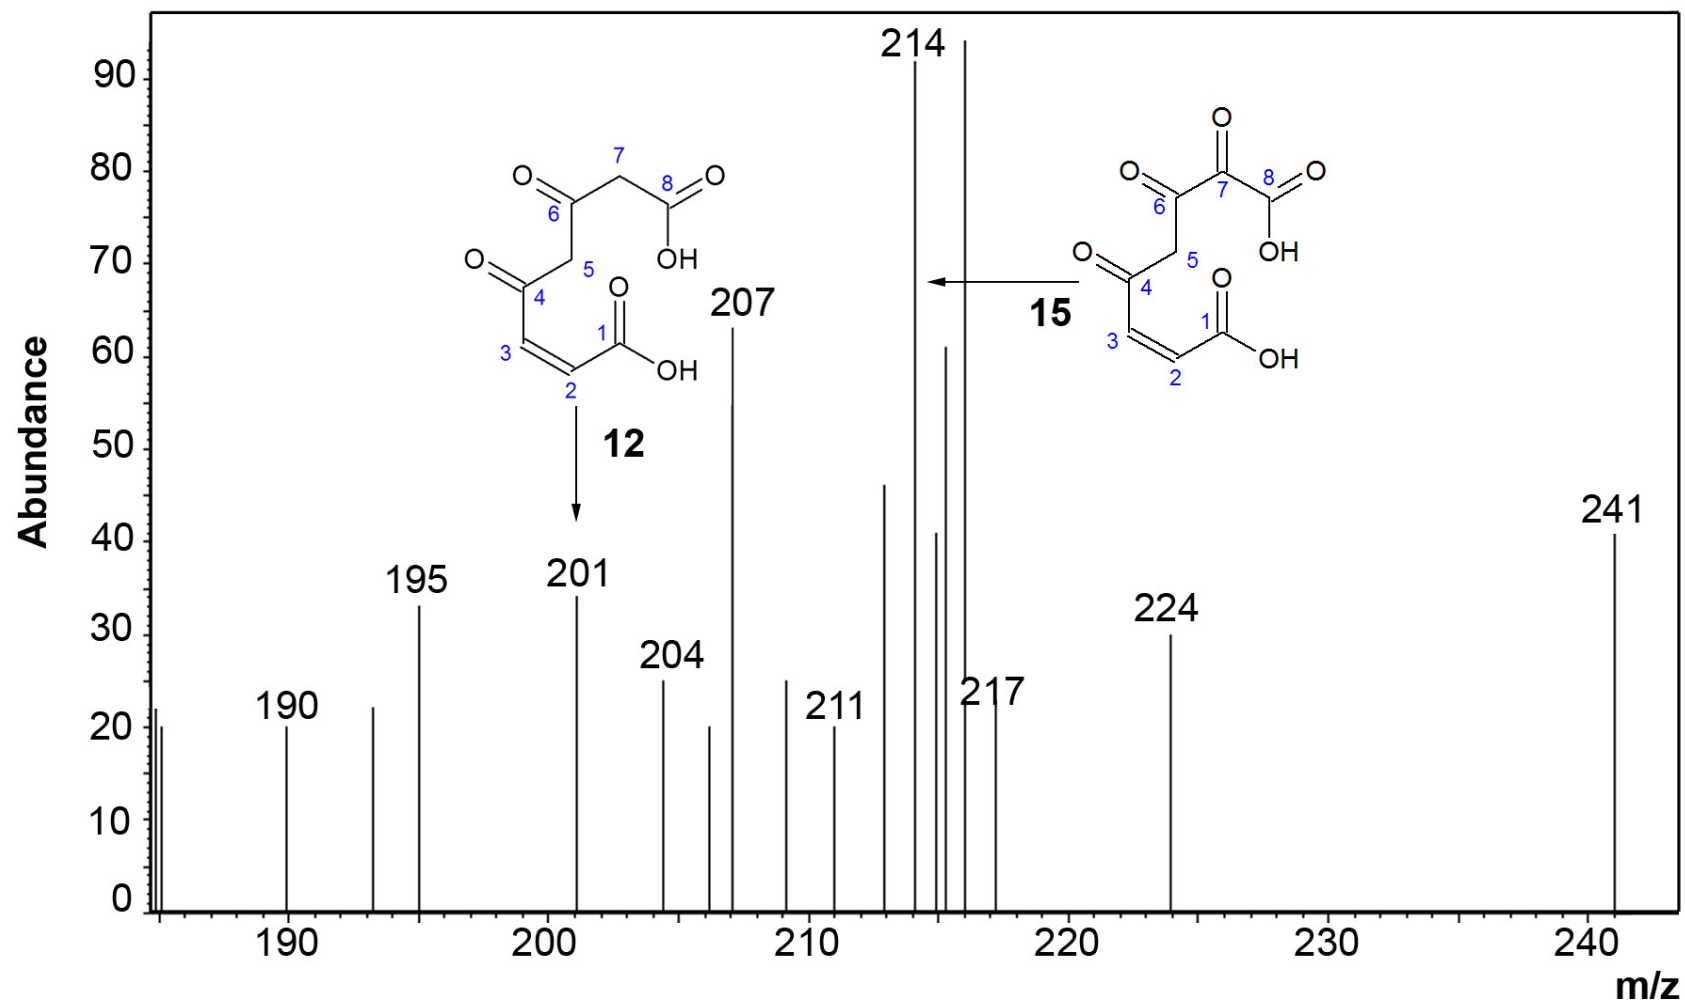

Supplementary Figure S7. Mass-spectra of **(12)** 4,6-dioxo-oct-2-*trans*-enedioic acid (fumarylacetoacetic acid),  $m/z=200.0$ ; **(15)** 4,6,7-trioxooct-2-enedioic acid,  $m/z=214.0$ .



Supplementary Table S1. R<sub>f</sub> values of DCF and its biodegradation products in culture liquids of *R. ruber* IEGM 346.

| No. | Test substance                                                    | Chemical structure                                                                                            | R <sub>f</sub> value                      |
|-----|-------------------------------------------------------------------|---------------------------------------------------------------------------------------------------------------|-------------------------------------------|
| 1   | Fumaric acid                                                      | 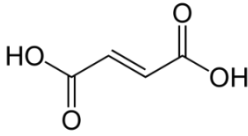 <p><b>Trans isomer</b></p> | <b>0.83</b>                               |
| 2   | Phenylacetic acid                                                 |                             | <b>0.64</b>                               |
| 3   | DCF                                                               |                             | <b>0.65</b>                               |
| 4   | Culture fluid containing 50% of residual DCF                      |                                                                                                               | <b>0.83</b><br><b>0.65</b><br><b>0.64</b> |
| 5   | The culture fluid containing only DCF metabolites (0% diclofenac) |                                                                                                               | <b>0.83</b>                               |

Note. Each value of R<sub>f</sub> is the average of three variables.

Identification of DCF biodegradation products using TLC in the system of benzene: 95% ethanol: glacial acetic acid (45:8:4, v/v/v) showed that fumaric acid was present in sample No. 5 (culture fluid containing only DCF metabolites).
